# Supplementary material for: Genetic Variants Associated with Long-Terminal Repeats Can Diagnostically Classify Cannabis Varieties
Source: MDPI journal article supplement (doi:10.3390/ijms232314531), 2022-11-22
Supplement: s1 [file s1]

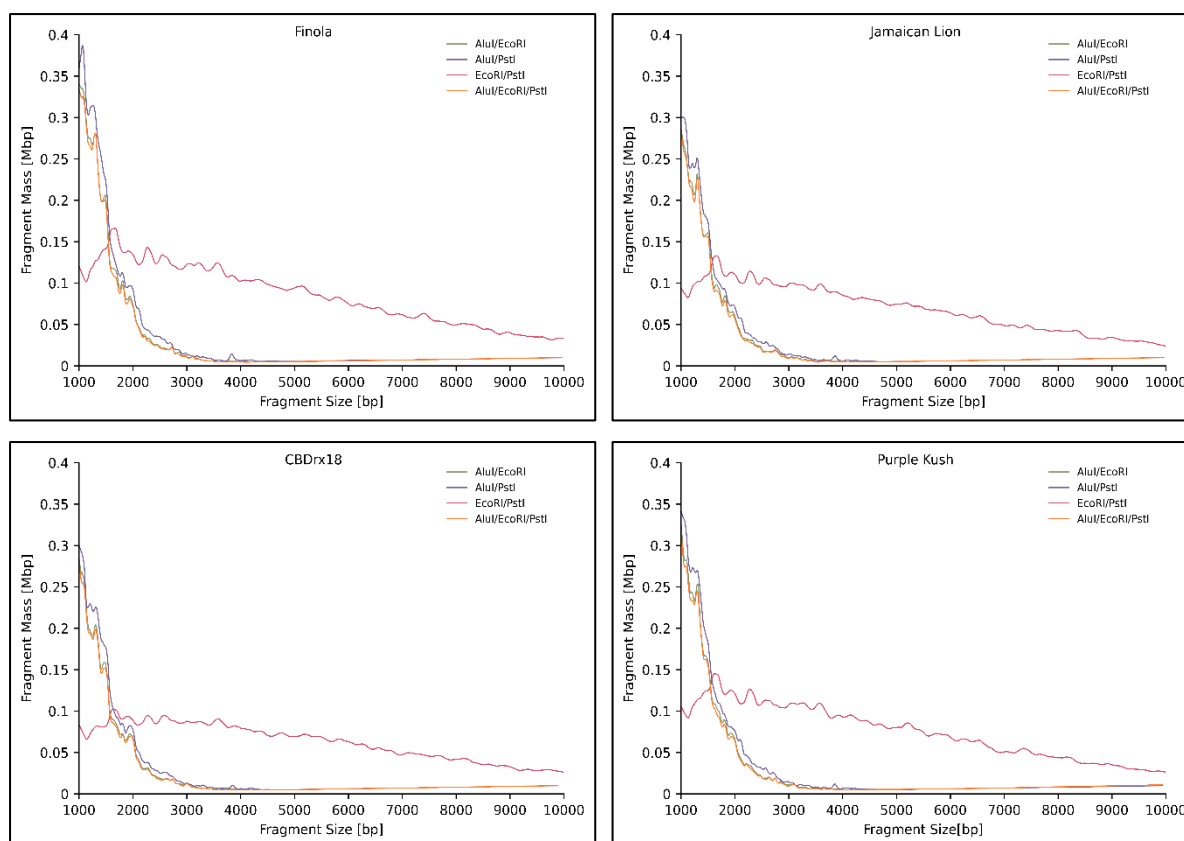

**Figure S1.** In-silico digest profiles of 4 Cannabis assemblies with 4 restriction enzyme combinations from 1 to 10kb fragment size. Four Cannabis assemblies, Finola (FN), Purple Kush (PK), CBDrx18 (CBD), and Jamaican Lion DASH (JLD), were digested in silico with four restriction endonuclease combinations, including the AluI/EcoRI, AluI/PstI, EcoRI/PstI, and AluI/EcoRI/PstI combinations, to examine the fragmentation profiles between 1kb to 10kb.

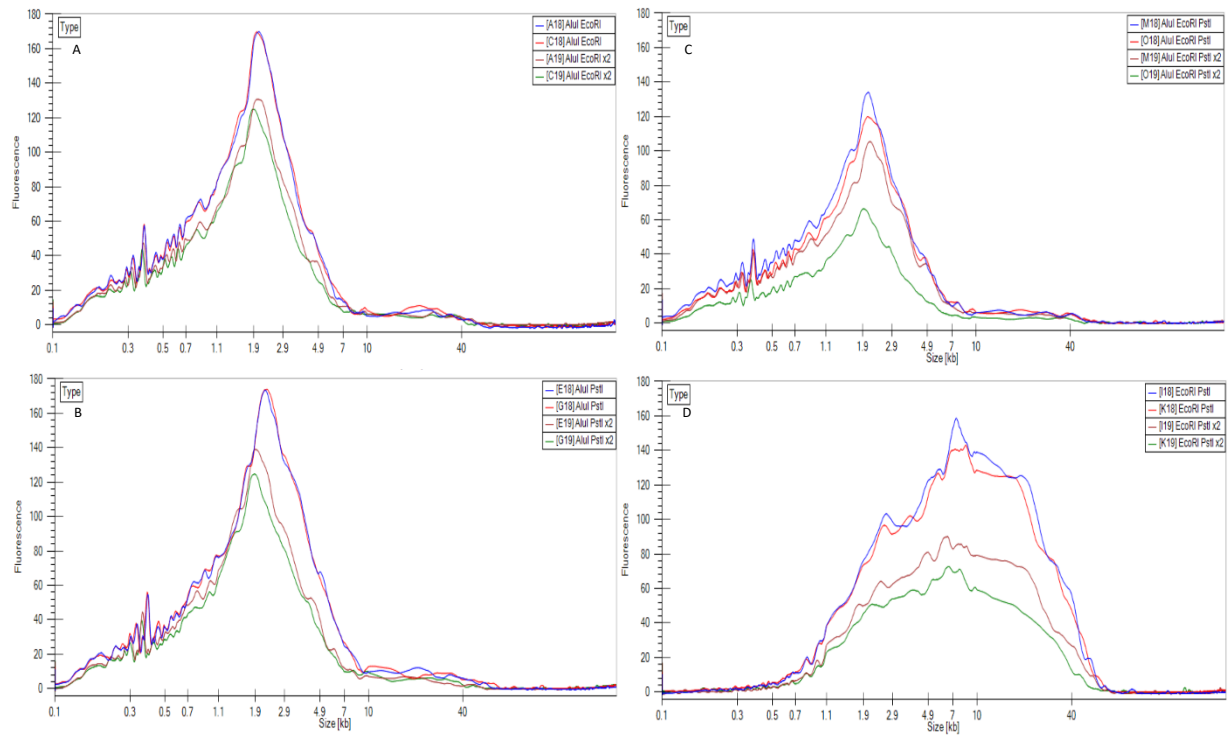

**Figure S2.** Single and double digest outcomes for restriction enzyme combinations. *Cannabis* gDNA was digested with four restriction endonuclease combinations, including the AluI/EcoRI, AluI/PstI, EcoRI/PstI, and AluI/EcoRI/PstI combinations and the fragmentation profiles were assessed using a LabChip GX.

**Table S1.** Cannabinoid biosynthesis gene coordinates including additional 500kb up and downstream.

| <b>Chromosome</b> | <b>Start - 500kb</b> | <b>Start</b> | <b>Stop</b> | <b>Stop + 500kb</b> | <b>Gene</b> |
|-------------------|----------------------|--------------|-------------|---------------------|-------------|
| AGQN03000389.1    | 0                    | 175327       | 182874      | 682874              | HDR         |
| Chr1              | 55925011             | 56425011     | 56430287    | 56930287            | PKS         |
| Chr1              | 40300096             | 40800096     | 40808418    | 41308418            | HMGS        |
| Chr1              | 51134888             | 51634888     | 51644792    | 52144792            | PMK         |
| Chr2              | 55180934             | 55680934     | 55686341    | 56186341            | GPPS ssu    |
| Chr2              | 68434029             | 68934029     | 68955726    | 69455726            | DXS1        |
| Chr3              | 25894662             | 26394662     | 26401664    | 26901664            | MK          |
| Chr4              | 8524298              | 9024298      | 9034714     | 9534714             | DXR         |
| Chr4              | 37803447             | 38303447     | 38318838    | 38818838            | AAE1        |
| Chr5              | 622073               | 1122073      | 1126936     | 1626936             | GPPS ssu2   |
| Chr5              | 59163665             | 59663665     | 59674108    | 60174108            | HDS         |
| Chr5              | 3247761              | 3747761      | 3757729     | 4257729             | OAC         |
| Chr6              | 18526191             | 19026191     | 19034144    | 19534144            | MPDC        |
| Chr6              | 5048446              | 5548446      | 5556699     | 6056699             | FPPS        |
| Chr6              | 61582305             | 62082305     | 62093091    | 62593091            | CBDAS       |
| Chr7              | 9571611              | 10071611     | 10080024    | 10580024            | CMK         |
| Chr7              | 7563636              | 8063636      | 8075446     | 8575446             | ACCa        |
| Chr9              | 0                    | 6779663      | 6785415     | 630053              | GPPS lsu    |
| Chr9              | 6279663              | 123153       | 130053      | 7285415             | IPP         |
| Chr9              | 7816822              | 8316822      | 8323797     | 8823797             | HMGR        |
| Chr9              | 28013194             | 28513194     | 28520778    | 29020778            | MCT         |
